# Supplementary material
Source: PubMed Central journal article supplement (PMC6618817)
Supplement: jamaneurol-76-1330-s002.pdf [file jamaneurol-76-1330-s002.pdf]

## Supplementary Online Content

Schneider LS, Thomas RG, Hendrix S, et al; Alzheimer's Disease Cooperative Study TCAD Study Group. Safety and efficacy of edonerpip maleate for patients with mild to moderate Alzheimer disease: a phase 2 randomized clinical trial. *JAMA Neurol*. Published online July 8, 2019. doi:10.1001/jamaneurol.2019.1868

**eTable 1.** Clinical Trial Outline and Flow

**eTable 2.** Individual Clinical Response Counting Non-completers as Non-responders, mITT Population

**eTable 3.** Multiple Clinical Response Definitions Counting Non-completers as Non-responders, mITT Population

**eTable 4.** Cerebrospinal Fluid Amyloid and Tau Analyses

**eTable 5.** Pharmacokinetic Parameters of Edonerpip

**eTable 6.** Penetration of Edonerpip and the M5 Metabolite Into CSF

**eTable 7.** Exploratory MRI Outcomes Performed Using NeuroQuant Volumes

**eAppendix 1.** Protocol-Specified Responder Analyses

**eAppendix 2.** CONSORT 2010 Checklist of Information to Include When Reporting a Randomized Trial

**eFigure.** Protocol-Specified Secondary Analyses

This supplementary material has been provided by the authors to give readers additional information about their work.

**eTable 1. Clinical Trial Outline and Flow**

| Visit Number                             | 1                                                 | 2                 | 3                | 4                | 5                 | 6                 | 7                 | 8                 | 9                 | 10                | 11 or Early Term  | 12                          |
|------------------------------------------|---------------------------------------------------|-------------------|------------------|------------------|-------------------|-------------------|-------------------|-------------------|-------------------|-------------------|-------------------|-----------------------------|
| Stage of study                           | Screening (within 42 days prior to randomization) | Baseline (Week 0) | Week 4 (±7 days) | Week 8 (±7 days) | Week 12 (±7 days) | Week 18 (±7 days) | Week 24 (±7 days) | Week 30 (±7 days) | Week 36 (±7 days) | Week 44 (±7 days) | Week 52 (±7 days) | Follow-Up Week 56 (±7 days) |
| Informed consent                         | X                                                 |                   |                  |                  |                   |                   |                   |                   |                   |                   |                   |                             |
| Demographics, medical history, education | X                                                 |                   |                  |                  |                   |                   |                   |                   |                   |                   |                   |                             |
| Inclusion / Exclusion criteria           | X                                                 | X                 |                  |                  |                   |                   |                   |                   |                   |                   |                   |                             |
| Height & Weight                          | X                                                 | X                 |                  |                  | X                 |                   | X                 |                   | X                 |                   | X                 |                             |
| Randomization                            | X                                                 |                   |                  |                  |                   |                   |                   |                   |                   |                   |                   |                             |
| Physical examination                     | X                                                 | X                 | X                | X                | X                 | X                 | X                 | X                 | X                 | X                 | X                 | X                           |
| Vital signs (Heart Rate and BP)          | X                                                 | X                 | X                | X                | X                 | X                 | X                 | X                 | X                 | X                 | X                 | X                           |
| Concomitant medications                  | X                                                 | X                 | X                | X                | X                 | X                 | X                 | X                 | X                 | X                 | X                 | X                           |
| Adverse Events                           | X                                                 | X                 | X                | X                | X                 | X                 | X                 | X                 | X                 | X                 | X                 | X                           |
| 12-lead ECG                              | X                                                 | X                 | X                | X                | X                 | X                 | X                 | X                 | X                 | X                 | X                 | X                           |
| Hematology, Serum chemistry              | X                                                 | X                 | X                | X                | X                 | X                 | X                 | X                 | X                 | X                 | X                 | X                           |
| Urine/urine                              | X                                                 | X                 | X                | X                | X                 | X                 | X                 | X                 | X                 | X                 | X                 | X                           |
| PPK blood draw                           |                                                   | X                 |                  |                  |                   |                   |                   |                   |                   |                   |                   |                             |
| Apoe4 and CYP2D6                         |                                                   | X                 |                  | X                | X                 | X                 | X                 | X                 | X                 | X                 | X                 | X                           |
| Study drug dispense                      |                                                   | X                 | X                | X                | X                 | X                 | X                 | X                 | X                 | X                 | X                 | X                           |
| Study drug collection/compliance         |                                                   | X                 | X                | X                | X                 | X                 | X                 | X                 | X                 | X                 | X                 | X                           |
| ADAS-COG                                 | X                                                 | X                 |                  |                  |                   |                   |                   |                   |                   |                   |                   |                             |
| ADCS-CGIC                                |                                                   | X                 | X                | X                | X                 | X                 | X                 | X                 | X                 | X                 | X                 | X                           |
| ADCS-ADL                                 |                                                   | X                 | X                | X                | X                 | X                 | X                 | X                 | X                 | X                 | X                 | X                           |
| MMSE                                     |                                                   | X                 | X                | X                | X                 | X                 | X                 | X                 | X                 | X                 | X                 | X                           |
| NPI                                      |                                                   | X                 | X                | X                | X                 | X                 | X                 | X                 | X                 | X                 | X                 | X                           |
| FAQ                                      |                                                   | X                 | X                | X                | X                 | X                 | X                 | X                 | X                 | X                 | X                 | X                           |
| C-SSRS Pediatric                         |                                                   | X                 | X                | X                | X                 | X                 | X                 | X                 | X                 | X                 | X                 | X                           |
| vMRI or CT <sup>6</sup>                  | X                                                 |                   |                  |                  |                   |                   |                   |                   |                   |                   |                   |                             |
| CSF <sup>7</sup>                         |                                                   | X                 |                  |                  |                   |                   |                   |                   |                   |                   |                   |                             |

<sup>1</sup> Height is done at baseline only  
<sup>2</sup> B12 is done at Screening only  
<sup>3</sup> PPK blood draws should be done before the first dose of study medication at Baseline, before doing on the day of the Week 24 visit and 1-6 hours after patient's last dose of study medication at the other visits  
<sup>4</sup> C-SSRS Ped Lifetime Recent at Week 0 and C-SSRS Ped Since Last Visit at all others  
<sup>5</sup> CT at Screening if MRI is contraindicated and the patient has not had a brain CT within past year  
<sup>6</sup> Visit window for vMRI at Week 52 is 14 days before and up to 14 days after visit. If patient is terminating early at 36 week or after, obtain vMRI. Neither vMRI nor CT is necessary for patients who have a contraindication to MRI.  
<sup>7</sup> Only for the CSF substudy. Visit windows for CSF are up to 14 days prior to first dose of study medication and up to 14 days prior to Week 72 visit. If a patient in the CSF substudy is terminating early, they do not need to undergo lumbar puncture.  
<sup>8</sup> Only applies to patients not going to the extension period.

## eFigure. Protocol-Specified Secondary Analyses

Results for the ADAS-cog and ADCS-CGIC secondary outcomes at weeks 12, 24, 36, and 44; and the ADCS-ADL secondary outcome at week 52). The figure indicates the P values of the effects of each dose of edonepic maleate compared to placebo at each time interval. None of the contrasts showed nominal statistical significance.

(a) Change from baseline ADAS-cog

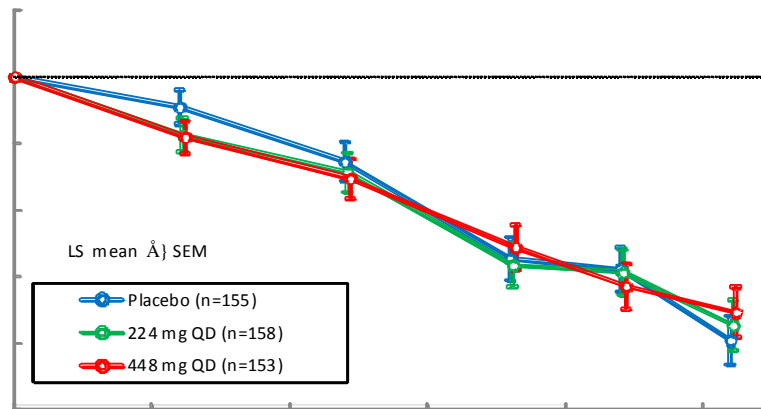

| Dose Group | Statistics      | Baseline | Adjusted Change from Baseline* |         |         |         |         |
|------------|-----------------|----------|--------------------------------|---------|---------|---------|---------|
|            |                 | Score    | Week 12                        | Week 24 | Week 36 | Week 44 | Week 52 |
| Placebo    | No. of Raw Data | 155      | 154                            | 146     | 141     | 140     | 137     |
|            | Mean            | 27.94    | 0.92                           | 2.55    | 5.47    | 5.78    | 7.91    |
| 224 mg QD  | No. of Raw Data | 158      | 156                            | 142     | 130     | 122     | 115     |
|            | Mean            | 27.68    | 1.74                           | 2.88    | 5.66    | 5.87    | 7.45    |
|            | Difference      | -        | 0.83                           | 0.33    | 0.19    | 0.09    | -0.47   |
|            | P value         | -        | 0.1614                         | 0.6518  | 0.8143  | 0.9197  | 0.6302  |
| 448 mg QD  | No. of Raw Data | 153      | 151                            | 130     | 121     | 117     | 117     |
|            | Mean            | 27.78    | 1.82                           | 3.06    | 5.12    | 6.29    | 7.08    |
|            | Difference      | -        | 0.90                           | 0.51    | -0.35   | 0.51    | -0.84   |
|            | P value         | -        | 0.1311                         | 0.4989  | 0.6787  | 0.5600  | 0.3919  |

\* Estimated by MMRM with covariates.

(b) Change from baseline ADCS-CGIC

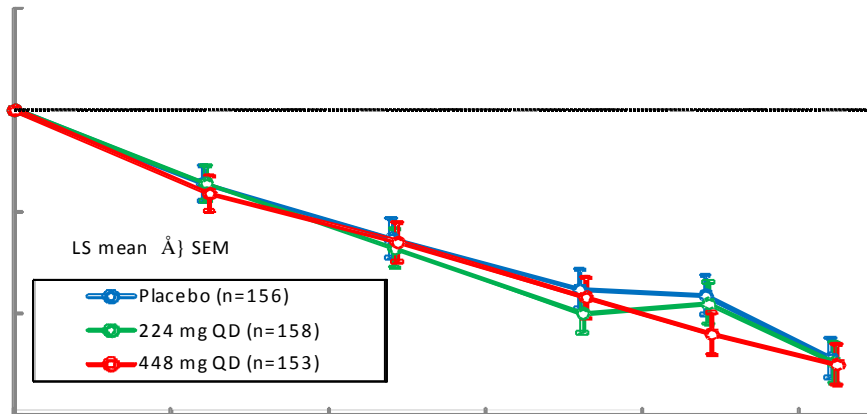

| Dose Group | Statistics      | Adjusted Score* |         |         |         |         |
|------------|-----------------|-----------------|---------|---------|---------|---------|
|            |                 | Week 12         | Week 24 | Week 36 | Week 44 | Week 52 |
| Placebo    | No. of Raw Data | 155             | 146     | 141     | 142     | 138     |
|            | Mean            | 4.36            | 4.63    | 4.88    | 4.91    | 5.22    |
| 224 mg QD  | No. of Raw Data | 156             | 141     | 130     | 121     | 116     |
|            | Mean            | 4.36            | 4.68    | 5.00    | 4.95    | 5.24    |
|            | Difference      | 0.01            | 0.05    | 0.12    | 0.03    | 0.03    |
|            | P value         | 0.9434          | 0.6359  | 0.2784  | 0.7697  | 0.8135  |
| 448 mg QD  | No. of Raw Data | 149             | 132     | 120     | 117     | 118     |
|            | Mean            | 4.41            | 4.65    | 4.92    | 5.10    | 5.25    |
|            | Difference      | 0.06            | 0.02    | 0.04    | 0.18    | 0.04    |
|            | P value         | 0.5466          | 0.8476  | 0.7290  | 0.1153  | 0.7588  |

\* Estimated by MMRM with covariates.

(c) Change from baseline ADCS-ADLs

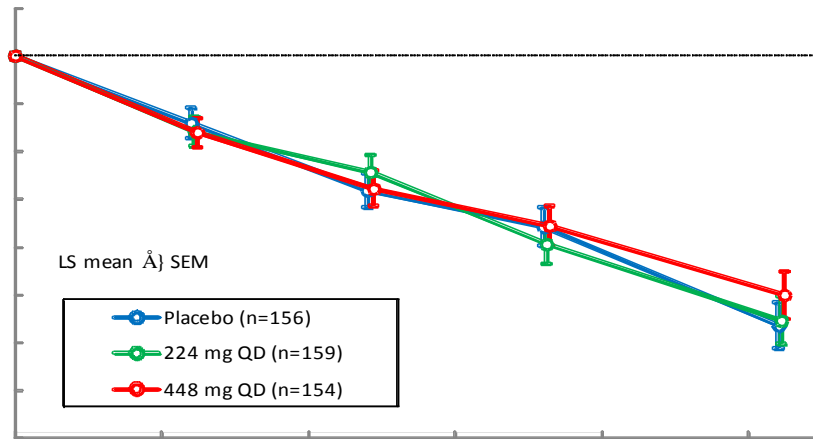

| Dose Group | Statistics      | Baseline Score | Adjusted Change from Baseline* |         |         |         |
|------------|-----------------|----------------|--------------------------------|---------|---------|---------|
|            |                 |                | Week 12                        | Week 24 | Week 36 | Week 52 |
| Placebo    | No. of Raw Data | 156            | 155                            | 147     | 144     | 140     |
|            | Mean            | 58.7           | -2.81                          | -5.63   | -7.14   | -11.29  |
| 224 mg QD  | No. of Raw Data | 159            | 158                            | 144     | 132     | 118     |
|            | Mean            | 58.7           | -3.17                          | -4.86   | -7.87   | -11.07  |
|            | Difference      | -              | -0.35                          | 0.76    | -0.73   | 0.23    |
|            | P value         | -              | 0.6235                         | 0.3921  | 0.4757  | 0.8604  |
| 448 mg QD  | No. of Raw Data | 154            | 152                            | 133     | 123     | 118     |
|            | Mean            | 59.5           | -3.21                          | -5.55   | -7.11   | -10.01  |
|            | Difference      | -              | -0.39                          | 0.08    | 0.03    | 1.29    |
|            | P value         | -              | 0.5877                         | 0.9308  | 0.9772  | 0.3212  |

\* Estimated by MMRM with covariates.

## **eAppendix 1. Protocol-Specified Responder Analyses**

### Methods

A clinical outcome responder analysis was specified in the statistical analysis plan to examine the relationship between clinical outcomes and treatment for the mITT and PP populations. Improvement was defined as a better score by the end of the study than at baseline. Stabilization was defined as an outcome that did not worsen or improved compared to baseline. For these analyses, the high and low doses of edonepic were grouped together as the active treatment group. Active treatment and placebo were compared for improvement or stabilization on each of the primary and secondary outcomes at endpoint. One analysis included completers and non-completers with non-completers counted as non-responders regardless of their last efficacy result. A second analysis compared only participants with non-missing efficacy outcomes at 52 weeks. The relationships between individual clinical responses and treatment were analyzed. In addition, multiple clinical responses were correlated with treatment using the two variations described above [Not reported].

Those who experienced the following combined clinical responses were summarized in terms of counts and percent:

- Improvement or stabilization on none of the 6 primary/secondary endpoints;
- Improvement or stabilization on 1 of the 6 primary/secondary endpoints;
- Improvement or stabilization on at least 2 of the 6 primary/secondary endpoints;
- Improvement or stabilization on at least 3 of the 6 primary/secondary endpoints;
- Improvement or stabilization on at least 4 of the 6 primary/secondary endpoints;
- Improvement or stabilization on at least 5 of the 6 primary/secondary endpoints;
- Improvement or stabilization on all primary/secondary endpoints.

Treatment groups were compared in terms of percent of patients who experienced the combined clinical response or response on the individual primary and secondary efficacy outcomes. Fisher's exact tests were performed to test if there was a significant difference in improving on individual and multiple clinical outcomes based on treatment group.

### Results

Results are displayed in tables S3 and S4. None of the response definitions favored medication, either when analyzed individually or with the multiple clinical response definitions. The only nominally statistically significant responses were in favor of placebo over edonepic.

#### Conclusion

Several responder analyses did not provide evidence for the clinical efficacy of edonepic.

**eTable 2.** Individual Clinical Response Counting Non-completers as Non-responders, mITT Population

| Efficacy Outcome<br>Statistic                  | Placebo<br>(N=156) | Active<br>(N=313) |
|------------------------------------------------|--------------------|-------------------|
| <b>ADAS-Cog</b>                                |                    |                   |
| Experienced No Change or Improved ( $\leq 0$ ) | 25 ( 16.0%)        | 43 ( 13.7%)       |
| Worsened ( $> 0$ )                             | 131 ( 84.0%)       | 270 ( 86.3%)      |
| P-value vs. Placebo                            |                    | 0.5779            |
| <b>ADCS-CGIC</b>                               |                    |                   |
| Experienced No Change or Improved ( $\leq 4$ ) | 32 ( 20.5%)        | 47 ( 15.0%)       |
| Worsened ( $> 4$ )                             | 124 ( 79.5%)       | 266 ( 85.0%)      |
| P-value vs. Placebo                            |                    | 0.1501            |
| <b>ADCS-ADL</b>                                |                    |                   |
| Experienced No Change or Improved ( $\geq 0$ ) | 17 ( 10.9%)        | 37 ( 11.8%)       |
| Worsened ( $< 0$ )                             | 139 ( 89.1%)       | 276 ( 88.2%)      |
| P-value vs. Placebo                            |                    | 0.8782            |
| <b>MMSE</b>                                    |                    |                   |
| Experienced No Change or Improved ( $\geq 0$ ) | 54 ( 34.6%)        | 70 ( 22.4%)       |
| Worsened ( $< 0$ )                             | 102 ( 65.4%)       | 243 ( 77.6%)      |
| P-value vs. Placebo                            |                    | 0.0055            |
| <b>FAQ</b>                                     |                    |                   |
| Experienced No Change or Improved ( $\leq 0$ ) | 31 ( 19.9%)        | 57 ( 18.2%)       |
| Worsened ( $> 0$ )                             | 125 ( 80.1%)       | 256 ( 81.8%)      |
| P-value vs. Placebo                            |                    | 0.7069            |
| <b>NPI</b>                                     |                    |                   |
| Experienced No Change or Improved ( $\leq 0$ ) | 79 ( 50.6%)        | 120 ( 38.3%)      |
| Worsened ( $> 0$ )                             | 77 ( 49.4%)        | 193 ( 61.7%)      |
| P-value vs. Placebo                            |                    | 0.0131            |



**eTable 3.** Multiple Clinical Response Definitions Counting Non-completers as Non-responders, mITT Population

| Statistic                                                                       | Placebo<br>(N=156) | Active<br>(N=313) |
|---------------------------------------------------------------------------------|--------------------|-------------------|
| 1-Improvement or Stabilization on 6 Primary/Secondary Outcomes                  | 1 ( 0.6%)          | 0 ( 0.0%)         |
| 2-Improvement or Stabilization on 0, 1, 2, 3, 4 or 5 Primary/Secondary Outcomes | 155 ( 99.4%)       | 313 (100.0%)      |
| P-value vs. Placebo                                                             |                    | 0.3326            |
| 1-Improvement or Stabilization on 5 or 6 Primary/Secondary Outcomes             | 5 ( 3.2%)          | 11 ( 3.5%)        |
| 2-Improvement or Stabilization on 0, 1, 2, 3 or 4 Primary/Secondary Outcomes    | 151 ( 96.8%)       | 302 ( 96.5%)      |
| P-value vs. Placebo                                                             |                    | 1.0000            |
| 1-Improvement or Stabilization on 4, 5 or 6 Primary/Secondary Outcomes          | 19 ( 12.2%)        | 28 ( 8.9%)        |
| 2-Improvement or Stabilization on 0, 1, 2 or 3 Primary/Secondary Outcomes       | 137 ( 87.8%)       | 285 ( 91.1%)      |
| P-value vs. Placebo                                                             |                    | 0.3273            |
| 1-Improvement or Stabilization on 3, 4, 5 or 6 Primary/Secondary Outcomes       | 37 ( 23.7%)        | 52 ( 16.6%)       |
| 2-Improvement or Stabilization on 0, 1 or 2 Primary/Secondary Outcomes          | 119 ( 76.3%)       | 261 ( 83.4%)      |
| P-value vs. Placebo                                                             |                    | 0.0797            |
| 1-Improvement or Stabilization on 2, 3, 4, 5 or 6 Primary/Secondary Outcomes    | 68 ( 43.6%)        | 103 ( 32.9%)      |
| 2-Improvement or Stabilization on 0 or 1 Primary/Secondary Outcomes             | 88 ( 56.4%)        | 210 ( 67.1%)      |
| P-value vs. Placebo                                                             |                    | 0.0254            |
| 1-Improvement or Stabilization on 1, 2, 3, 4, 5 or 6 Primary/Secondary Outcomes | 108 ( 69.2%)       | 180 ( 57.5%)      |
| 2-Improvement or Stabilization on 0 Primary/Secondary Outcomes                  | 48 ( 30.8%)        | 133 ( 42.5%)      |
| P-value vs. Placebo                                                             |                    | 0.0157            |

**eTable 4.** Cerebrospinal Fluid Amyloid and Tau Analyses

CSF Biomarkers at Week 52

|                                       | Placebo        |                                 | Edonepic maleate, 224 mg |                                 |                                       |         | Edonepic maleate, 448 mg |                                 |                                       |         |
|---------------------------------------|----------------|---------------------------------|--------------------------|---------------------------------|---------------------------------------|---------|--------------------------|---------------------------------|---------------------------------------|---------|
|                                       | Baseline (SD)  | Change from baseline, mean (SE) | Baseline (SD)            | Change from baseline, mean (SE) | Difference vs. placebo, mean (95% CI) | P Value | Baseline (SD)            | Change from baseline, mean (SE) | Difference vs. placebo, mean (95% CI) | P Value |
| CSF biomarker outcomes <sup>(b)</sup> |                |                                 |                          |                                 |                                       |         |                          |                                 |                                       |         |
| N                                     | N = 18         |                                 | N = 17                   |                                 |                                       |         | N = 24                   |                                 |                                       |         |
| Aβ 40, pg/mL                          | 6766 (2001)    | -916.0 (546.1)                  | 7275 (2477)              | -840.3 (559.5)                  | 75.7 (-1507.6, 1659.0)                | .92     | 8272 (2513)              | 290.8 (467.0)                   | 1206.9 (-236.4, 2650.2)               | .10     |
| Aβ 42, pg/mL                          | 407.0 (102.1)  | -21.35 (29.6)                   | 417.8 (144.9)            | -9.70 (30.4)                    | 11.65 (-73.4, 96.7)                   | .78     | 439.1 (121.3)            | 11.55 (25.6)                    | 32.90 (-45.6, 111.41)                 | .40     |
| PhosphoTau181, pg/mL                  | 102.8 (38.4)   | 0.29 (2.64)                     | 102.6 (33.4)             | -3.94 (2.72)                    | -4.23 (-11.83, 3.37)                  | .27     | 95.0 (29.8)              | -7.30 (2.28)                    | -7.59 (-14.57, -0.60)                 | .03     |
| Tau, pg/mL                            | 1147.7 (483.8) | 28.2 (37.7)                     | 1162.3 (421.6)           | -7.88 (38.6)                    | -36.10 (-144.3, 72.1)                 | .51     | 1085.0 (327.3)           | -101.4 (32.6)                   | -129.57 (-229.5, -29.6)               | .01     |

CSF Biomarker Outcomes Estimated by ANCOVA with Covariates

**eTable 5. Pharmacokinetic Parameters of Edonerpic**

| Parameters                    | Statistics | 224 mg QD | 448 mg QD |
|-------------------------------|------------|-----------|-----------|
| $C_{ss,max}$<br>(ng/mL)       | n          | 144       | 138       |
|                               | Mean       | 271.30    | 618.68    |
|                               | SD         | 99.67     | 222.28    |
|                               | CV (%)     | 36.7      | 35.9      |
|                               | Geo. Mean  | 256.22    | 583.17    |
|                               | Median     | 253.57    | 563.96    |
|                               | Min        | 107.55    | 254.71    |
| $C_{ss,min}$<br>(ng/mL)       | Max        | 878.30    | 1636.00   |
|                               | n          | 144       | 138       |
|                               | Mean       | 65.57     | 125.64    |
|                               | SD         | 57.56     | 118.17    |
|                               | CV (%)     | 87.8      | 94.1      |
|                               | Geo. Mean  | 49.95     | 95.05     |
|                               | Median     | 44.05     | 82.45     |
| $AUC_{ss,\tau}$<br>(ng*hr/mL) | Min        | 15.32     | 10.11     |
|                               | Max        | 315.70    | 783.80    |
|                               | n          | 144       | 138       |
|                               | Mean       | 3409.90   | 7345.74   |
|                               | SD         | 1521.07   | 3390.85   |
|                               | CV (%)     | 44.6      | 46.2      |
|                               | Geo. Mean  | 3140.93   | 6740.31   |
| $AUC_{ss,\tau}$<br>(ng*hr/mL) | Median     | 3040.32   | 6371.42   |
|                               | Min        | 1475.46   | 2640.38   |
|                               | Max        | 9321.73   | 24005.99  |

**eTable 6.** Penetration of Edonepic and the M5 Metabolite Into CSF

|          | Statistics | CSF Concentration (ng/mL) | Plasma Concentration (ng/mL) | Ratio |
|----------|------------|---------------------------|------------------------------|-------|
| edonepic | N          | 31                        | 30                           | 30    |
|          | Mean       | 41.07                     | 437.36                       | 0.107 |
|          | SD         | 31.22                     | 279.23                       | 0.055 |
|          | Median     | 34.00                     | 373.50                       | 0.107 |
|          | Min        | 3.22                      | 83.7                         | 0.008 |
|          | Max        | 119                       | 1090                         | 0.201 |
| M5       | n          | 31                        | 30                           | 30    |
|          | Mean       | 9.57                      | 390.48                       | 0.034 |
|          | SD         | 10.71                     | 305.93                       | 0.034 |
|          | Median     | 5.28                      | 306.00                       | 0.024 |
|          | Min        | 0                         | 40.9                         | 0     |
|          | Max        | 50.1                      | 1310                         | 0.163 |

**eTable 7.** Exploratory MRI Outcomes Performed Using NeuroQuant Volumes

|                                                       | Placebo<br>(N=120) | Edonerpic<br>maleate, 224 mg<br>(N=99) | Edonerpic<br>maleate, 448<br>mg (N=99) |
|-------------------------------------------------------|--------------------|----------------------------------------|----------------------------------------|
| Brain volume <sup>2</sup>                             |                    |                                        |                                        |
| Baseline, mL, mean (SD)                               | 841.3 (91.47)      | 841.8 (101.30)                         | 859.1 (99.02)                          |
| N                                                     | 118                | 99                                     | 98                                     |
| Adjusted change from baseline,<br>mean (SE)           | -23.32 (2.670)     | -19.92 (2.698)                         | -20.09 (2.842)                         |
| Treatment vs. Placebo                                 |                    |                                        |                                        |
| Difference vs. placebo, mean<br>(95% CI)              |                    | 3.40 (-2.35, 9.14)                     | 3.23 (-2.52,<br>8.99)                  |
| P-value                                               |                    | 0.25                                   | 0.27                                   |
| Effect size, Cohen's d                                |                    | 0.16                                   | 0.15                                   |
| Lateral ventricle volume, right and left <sup>2</sup> |                    |                                        |                                        |
| Baseline, mL, mean (SD)                               | 56.8 (22.22)       | 56.0 (22.68)                           | 57.6 (26.22)                           |
| N                                                     | 118                | 99                                     | 98                                     |
| Adjusted change from baseline,<br>mean (SE)           | 6.54 (0.622)       | 6.09 (0.632)                           | 7.25 (0.668)                           |
| Treatment vs. Placebo                                 |                    |                                        |                                        |
| Difference vs. placebo, mean<br>(95% CI)              |                    | -0.45 (-1.63, 0.74)                    | 0.71 (-0.47,<br>1.89)                  |
| P-value                                               |                    | 0.46                                   | 0.24                                   |
| Effect size, Cohen's d                                |                    | -0.11                                  | 0.17                                   |

| Hippocampal volume, right and left <sup>2</sup> |               |                   |                    |
|-------------------------------------------------|---------------|-------------------|--------------------|
| Baseline, mL mean (SD)                          | 5.3 (1.03)    | 5.2 (0.99)        | 5.1 (1.13)         |
| N                                               | 118           | 99                | 98                 |
| Adjusted change from baseline, mean (SE)        | -0.38 (0.039) | -0.28 (0.039)     | -0.31 (0.042)      |
| Treatment vs. Placebo                           |               |                   |                    |
| Difference vs. placebo, mean (95% CI)           |               | 0.10 (0.02, 0.17) | 0.06 (-0.02, 0.14) |
| P-value                                         |               | 0.016             | 0.12               |
| Effect size, Cohen's d                          |               | 0.34              | 0.22               |

## eAppendix 2. CONSORT 2010 Checklist of Information to Include When Reporting a Randomized Trial\*

| Section/Topic                    | Item No | Checklist item                                                                                                                                                                              | Reported, page No. |
|----------------------------------|---------|---------------------------------------------------------------------------------------------------------------------------------------------------------------------------------------------|--------------------|
| <b>Title and abstract</b>        |         |                                                                                                                                                                                             |                    |
|                                  | 1a      | Identification as a randomised trial in the title                                                                                                                                           | 1                  |
|                                  | 1b      | Structured summary of trial design, methods, results, and conclusions (for specific guidance see CONSORT for abstracts)                                                                     | 3                  |
| <b>Introduction</b>              |         |                                                                                                                                                                                             |                    |
| Background and objectives        | 2a      | Scientific background and explanation of rationale                                                                                                                                          | 4                  |
|                                  | 2b      | Specific objectives or hypotheses                                                                                                                                                           | 4                  |
| <b>Methods</b>                   |         |                                                                                                                                                                                             |                    |
| Trial design                     | 3a      | Description of trial design (such as parallel, factorial) including allocation ratio                                                                                                        | 5                  |
|                                  | 3b      | Important changes to methods after trial commencement (such as eligibility criteria), with reasons                                                                                          | N/A                |
| Participants                     | 4a      | Eligibility criteria for participants                                                                                                                                                       | 5                  |
|                                  | 4b      | Settings and locations where the data were collected                                                                                                                                        | 9, 18              |
| Interventions                    | 5       | The interventions for each group with sufficient details to allow replication, including how and when they were actually administered                                                       | 6                  |
| Outcomes                         | 6a      | Completely defined pre-specified primary and secondary outcome measures, including how and when they were assessed                                                                          | 6-7                |
|                                  | 6b      | Any changes to trial outcomes after the trial commenced, with reasons                                                                                                                       | N/A                |
| Sample size                      | 7a      | How sample size was determined                                                                                                                                                              | 8                  |
|                                  | 7b      | When applicable, explanation of any interim analyses and stopping guidelines                                                                                                                | N/A                |
| Randomisation:                   |         |                                                                                                                                                                                             |                    |
| Sequence generation              | 8a      | Method used to generate the random allocation sequence                                                                                                                                      | 5-6                |
|                                  | 8b      | Type of randomisation; details of any restriction (such as blocking and block size)                                                                                                         | 5-6                |
| Allocation concealment mechanism | 9       | Mechanism used to implement the random allocation sequence (such as sequentially numbered containers), describing any steps taken to conceal the sequence until interventions were assigned | 5-6                |
| Implementation                   | 10      | Who generated the random allocation sequence, who enrolled participants, and who assigned participants to interventions                                                                     | 5                  |
| Blinding                         | 11a     | If done, who was blinded after assignment to interventions (e.g., participants, care providers, those assessing outcomes) and how                                                           | 5-6                |
|                                  | 11b     | If relevant, description of the similarity of interventions                                                                                                                                 | 6                  |

|                                                      |     |                                                                                                                                                   |                           |
|------------------------------------------------------|-----|---------------------------------------------------------------------------------------------------------------------------------------------------|---------------------------|
| Statistical methods                                  | 12a | Statistical methods used to compare groups for primary and secondary outcomes                                                                     | 8-9                       |
|                                                      | 12b | Methods for additional analyses, such as subgroup analyses and adjusted analyses                                                                  | 9                         |
| <b>Results</b>                                       |     |                                                                                                                                                   |                           |
| Participant flow (a diagram is strongly recommended) | 13a | For each group, the numbers of participants who were randomly assigned, received intended treatment, and were analysed for the primary outcome    | 9-10                      |
|                                                      | 13b | For each group, losses and exclusions after randomisation, together with reasons                                                                  | 10<br>Figure 1            |
| Recruitment                                          | 14a | Dates defining the periods of recruitment and follow-up                                                                                           | 9                         |
|                                                      | 14b | Why the trial ended or was stopped                                                                                                                | N/A                       |
| Baseline data                                        | 15  | A table showing baseline demographic and clinical characteristics for each group                                                                  | Table 1                   |
| Numbers analysed                                     | 16  | For each group, number of participants (denominator) included in each analysis and whether the analysis was by original assigned groups           | 9-11 Table 2              |
| Outcomes and estimation                              | 17a | For each primary and secondary outcome, results for each group, and the estimated effect size and its precision (such as 95% confidence interval) | 10<br>Figure 2<br>Table 2 |
|                                                      | 17b | For binary outcomes, presentation of both absolute and relative effect sizes is recommended                                                       | N.A.                      |
| Ancillary analyses                                   | 18  | Results of any other analyses performed, including subgroup analyses and adjusted analyses, distinguishing pre-specified from exploratory         | Suppl. Table S3 to S7     |
| Harms                                                | 19  | All important harms or unintended effects in each group (for specific guidance see CONSORT for harms)                                             | 12, Table 3               |
| <b>Discussion</b>                                    |     |                                                                                                                                                   |                           |
| Limitations                                          | 20  | Trial limitations, addressing sources of potential bias, imprecision, and, if relevant, multiplicity of analyses                                  | 13-15                     |
| Generalisability                                     | 21  | Generalisability (external validity, applicability) of the trial findings                                                                         | 13-15                     |
| Interpretation                                       | 22  | Interpretation consistent with results, balancing benefits and harms, and considering other relevant evidence                                     | 14-15                     |
| <b>Other information</b>                             |     |                                                                                                                                                   |                           |
| Registration                                         | 23  | Registration number and name of trial registry                                                                                                    | 3                         |
| Protocol                                             | 24  | Where the full trial protocol can be accessed, if available                                                                                       | Supplement                |
| Funding                                              | 25  | Sources of funding and other support (such as supply of drugs), role of funders                                                                   | 17                        |

\*see [www.consort-statement.org](http://www.consort-statement.org).
