# Supplementary material
Source: PubMed Central journal article supplement (PMC6618817)
Supplement: jamaneurol-76-1330-s003.pdf [file jamaneurol-76-1330-s003.pdf]

## Data Sharing Statement

Schneider. Safety and Efficacy of Edonerpic Maleate for Patients With Mild to Moderate Alzheimer Disease. *JAMA Neurol.* Published July 08, 2019. 10.1001/jamaneurol.2019.1868

### Data

**Data available:** Yes

**Data types:** Deidentified participant data

**How to access data:** UCSD ADCS

**When available:** beginning date: 07-01-2019

### Supporting Documents Document types:

Data Dictionary, Protocol, CSV data files

### Additional Information

**Who can access the data:** Qualified researchers

**Types of analyses:** For Academic and Non-commercial use

**Mechanisms of data availability:** with a signed data access agreement
